# Supplementary material
Source: publisher figshare collection journal article supplement (https://aacr.figshare.com/articles/dataset/_/22674927)
Supplement: Supplementary file 1 [file 40244724]

**Supplementary-Table-4. Definitions used for adjudication and grading of the different evaluated events**  
(adapted from National Cancer Institute – Common Toxicity Criteria for Adverse Events).

| Outcome studied                       | Grade | Definition                                                                                                                                                                                  |
|---------------------------------------|-------|---------------------------------------------------------------------------------------------------------------------------------------------------------------------------------------------|
| <b>Cardiac dysfunction (LVEF)</b>     |       |                                                                                                                                                                                             |
| Mild (asymptomatic)                   | 1     | - Asymptomatic increase in biomarkers (NT-proBNP, BNP) or appearance of LV abnormality (wall motion abnormalities or LVEF between 35 and 50%)                                               |
| Moderate (heart dysfunction)          | 2     | - Heart failure symptoms (mild) not requiring intravenous diuretics associated with increased biomarkers (NT-proBNP, BNP) or LV abnormality<br>- Appearance of asymptomatic LVEF $\leq$ 35% |
| Severe (heart failure)                | 3     | - Heart failure symptoms requiring/resolving on intravenous diuretics associated with increased biomarkers (NT-proBNP, BNP) or appearance of LV abnormality                                 |
| Life-threatening (cardiogenic shock)  | 4     | - Cardiogenic shock requiring inotropes and/or hemodynamic support                                                                                                                          |
| Fatal                                 | 5     | - Leading to death                                                                                                                                                                          |
| <b>Cardiac arrhythmias (ECG)</b>      |       |                                                                                                                                                                                             |
| Mild                                  | 1     | - Modification of ECG with no severity criteria*                                                                                                                                            |
| Moderate                              | 2     | - Modification of ECG with appearance vs. baseline ECG pre-ICI of micro-voltage, pathological Q-waves, QRS $\geq$ 150msec or delta QRS vs. baseline $\geq$ 30msec                           |
| Severe                                | 3     | - Asymptomatic non-sustained ventricular tachycardia, or intermittent high degree atrio-ventricular block or sinus dysfunction                                                              |
| Life-threatening                      | 4     | - Symptomatic or sustained ventricular tachycardia, or persistent high degree atrio-ventricular block or sinus dysfunction                                                                  |
| Fatal                                 | 5     | - Leading to death                                                                                                                                                                          |
| <b>Respiratory muscle dysfunction</b> |       |                                                                                                                                                                                             |
| Mild (asymptomatic)                   | 1     | - Asymptomatic but abnormal respiratory muscles explorations                                                                                                                                |
| Moderate (dysfunction)                | 2     | - Symptomatic but no alveolar hypoventilation                                                                                                                                               |
| Severe (failure)                      | 3     | - Hypoventilation but no indication for mechanical ventilation                                                                                                                              |
| Life-threatening                      | 4     | - Hypoventilation requiring mechanical ventilation                                                                                                                                          |
| Fatal                                 | 5     | - Leading to death                                                                                                                                                                          |

Abbreviations: (NT-pro)BNP: (N-terminal pro) brain natriuretic peptide; LV(EF): left ventricular (ejection fraction)

\* Severity criteria on ECG include appearance of pathological Q-waves, micro-voltage, QRS $\geq$ 150msec or delta $\geq$ 30msec vs. baseline pre-ICI, ventricular tachycardia, high-degree atrioventricular block or sinus dysfunction(1)

## REFERENCE

1. Power JR, Alexandre J, Choudhary A, Ozbay B, Hayek S, Asnani A, *et al.* Electrocardiographic Manifestations of Immune Checkpoint Inhibitor Myocarditis. *Circulation* **2021**;144(18):1521-3 doi 10.1161/CIRCULATIONAHA.121.055816.
